# Supplementary material
Source: MDPI journal article supplement (https://www.mdpi.com/2073-4352/13/12/1660)
Supplement: s1 [file s1]

Supporting Materials for:

# Angular-Dependent Back Reflection of Chiral-Nematic Liquid Crystal Microparticles as Multifunctional Optical Elements

Tomoki Shigeyama<sup>1</sup>, Kohsuke Matsumoto<sup>1</sup>, Kyohei Hisano<sup>1†,\*</sup> and Osamu Tsutsumi<sup>1,\*</sup>

<sup>1</sup>Department of Applied Chemistry, Ritsumeikan University; 1-1-1 Nojihigashi, Kusatsu 525-8577, Japan; [sc0060kf@ed.ritsumei.ac.jp](mailto:sc0060kf@ed.ritsumei.ac.jp) (T.S.); [tsutsumi@sk.ritsumei.ac.jp](mailto:tsutsumi@sk.ritsumei.ac.jp) (O.T.)

<sup>†</sup> Present address: Laboratory for Chemistry and Life Science, Institute of Innovative Research, Tokyo Institute of Technology; 4259 Nagatsuta, Midori-ku, Yokohama 226-8501, Japan.; [hisano@res.titech.ac.jp](mailto:hisano@res.titech.ac.jp) (K.H.)

\* Correspondence: [hisano@res.titech.ac.jp](mailto:hisano@res.titech.ac.jp) (K.H.); [tsutsumi@sk.ritsumei.ac.jp](mailto:tsutsumi@sk.ritsumei.ac.jp); Tel.: +81-77-561-5966 (O.T.).

## Table of Contents

1. Supplementary Figures S1 to S3
2. Supplementary Table S1

## 1. Supplementary Figures

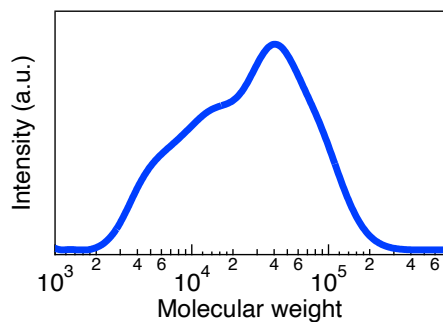

Figure S1. Size-exclusion chromatogram of P2. Molecular weight was calibrated with polystyrene standard.

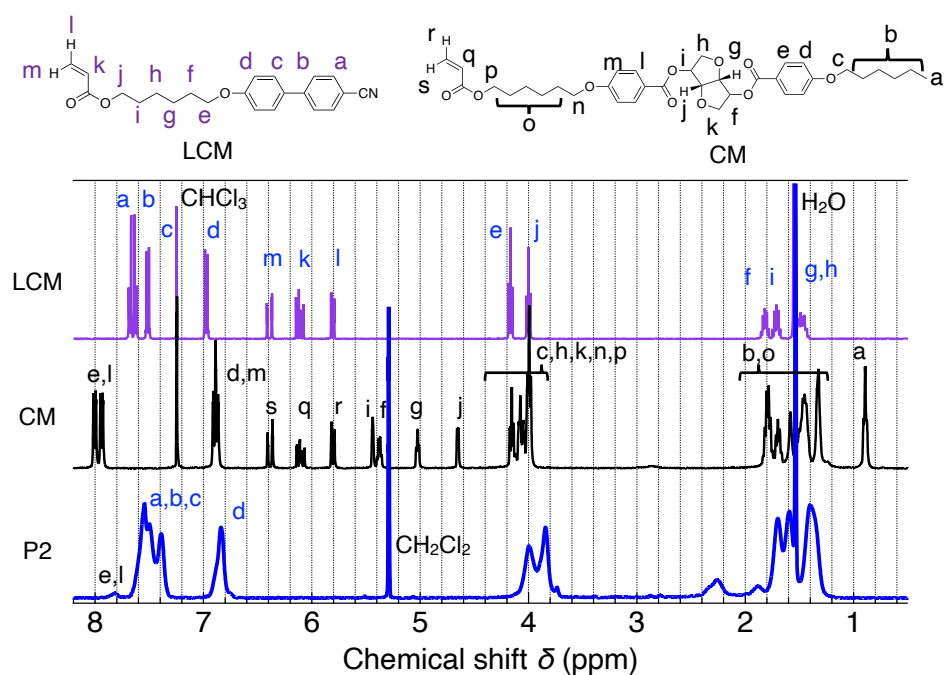

Figure S2. (a) <sup>1</sup>H NMR spectra for monomers and P2 as a representative example: (purple) LCM in CDCl<sub>3</sub>, (black) CM in CDCl<sub>3</sub>, (blue) P2 in CD<sub>2</sub>Cl<sub>2</sub>. The copolymer composition was determined using area of the peak at 7.8 and 7.5 ppm.

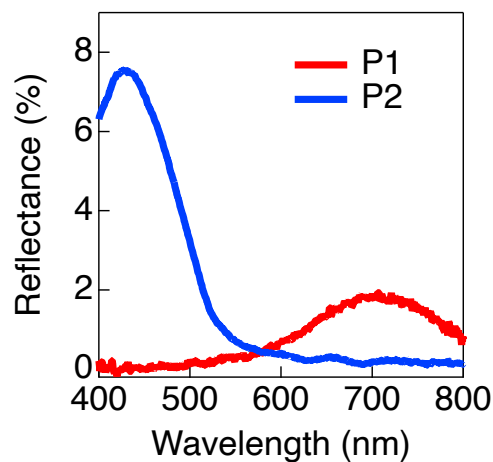

**Figure S3.** Reflection spectra of the N\* LC polymer particles of P1 and P2 measured with integration sphere [19]. The reflection peaks were 700 nm for P1 and 420 nm for P2, respectively.

## 2. Supplementary Table

Table S1. Polymerization composition for synthesis of the N\* LC particles.

| Particle | LCM <sup>1,2</sup> | CM <sup>1,2</sup> | PVP <sup>1</sup> | AIBN <sup>1</sup> | Solvents (vol/vol) |          | Conversion (%) |
|----------|--------------------|-------------------|------------------|-------------------|--------------------|----------|----------------|
|          |                    |                   |                  |                   | DMF                | Methanol |                |
| P1       | 97.6               | 2.4               | 130              | 4.0               | 50                 | 50       | 53             |
| P2       | 96.2               | 3.8               |                  |                   |                    |          | 51             |

<sup>1</sup> Molar ratio of the materials in the polymerization mixture.

<sup>2</sup> Total concentration of monomers in the polymerization solution was maintained at 7.3 wt%.
